# Supplementary material for: Inhibition of nonsense-mediated RNA decay by ER stress
Source: PubMed Central journal article supplement — RNA. 2017 Mar;23(3):378–94. doi: 10.1261/rna.058040.116 (PMC5311500; doi:10.1261/rna.058040.116), 2017-03
Supplement: supp_058040.116_Supplemental_Material.pdf [file supp_058040.116_Supplemental_Material.pdf]

**A**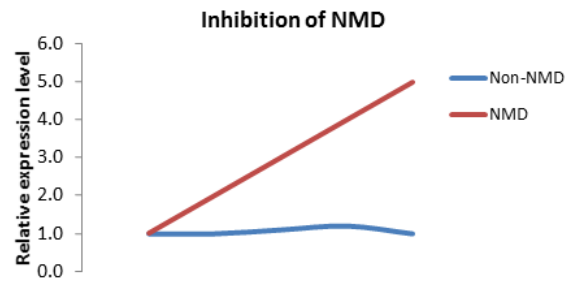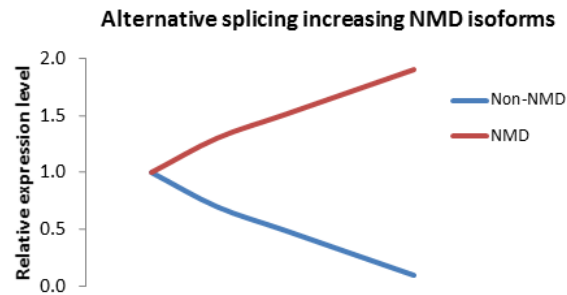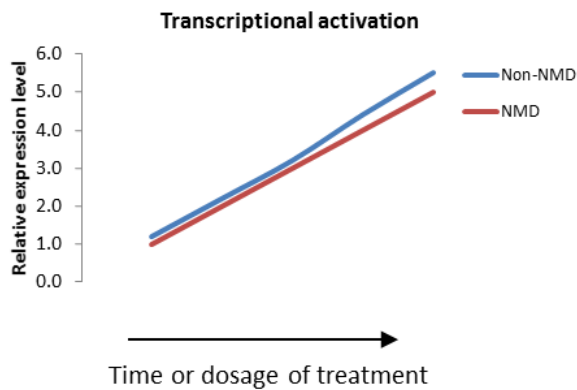**B**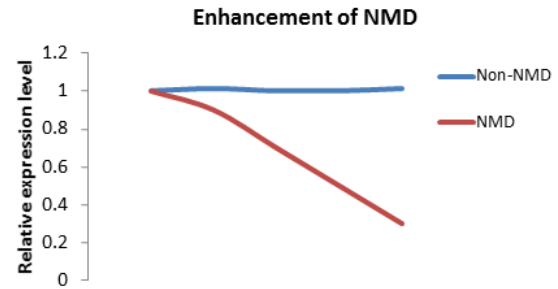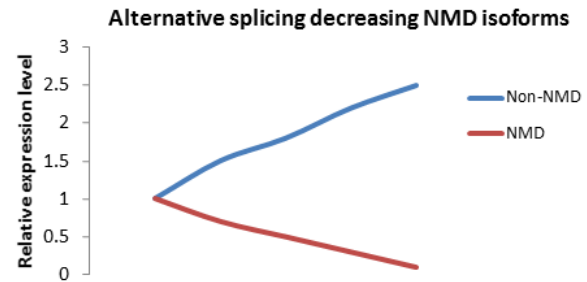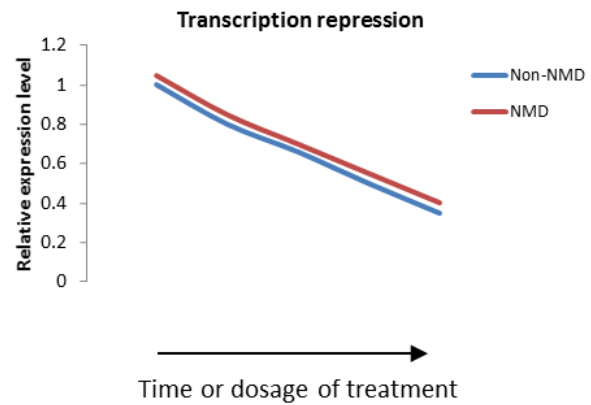

**Supplemental Figure S1.** (A) In scenarios where NMD isoform levels increase, assaying the non-NMD isoforms distinguishes NMD regulation from transcriptional activation and alternative splicing regulation. (B) In scenarios where NMD isoform levels decrease, assaying the non-NMD isoforms distinguishes NMD regulation from transcriptional repression and alternative splicing regulation.

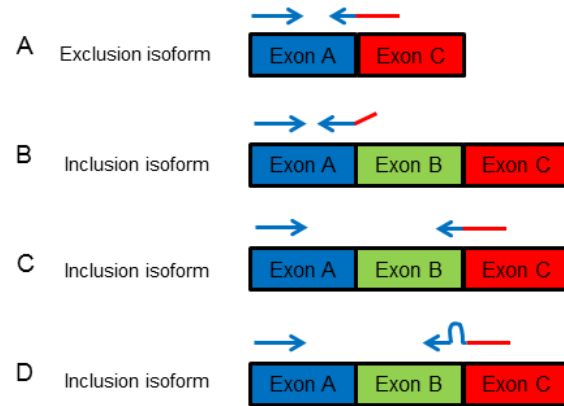

**Supplemental Figure S2.** Schematics of potential complementary binding of the skipping-isoform specific junction primers to (A) the exclusion isoform or (B-D) the inclusion isoform.

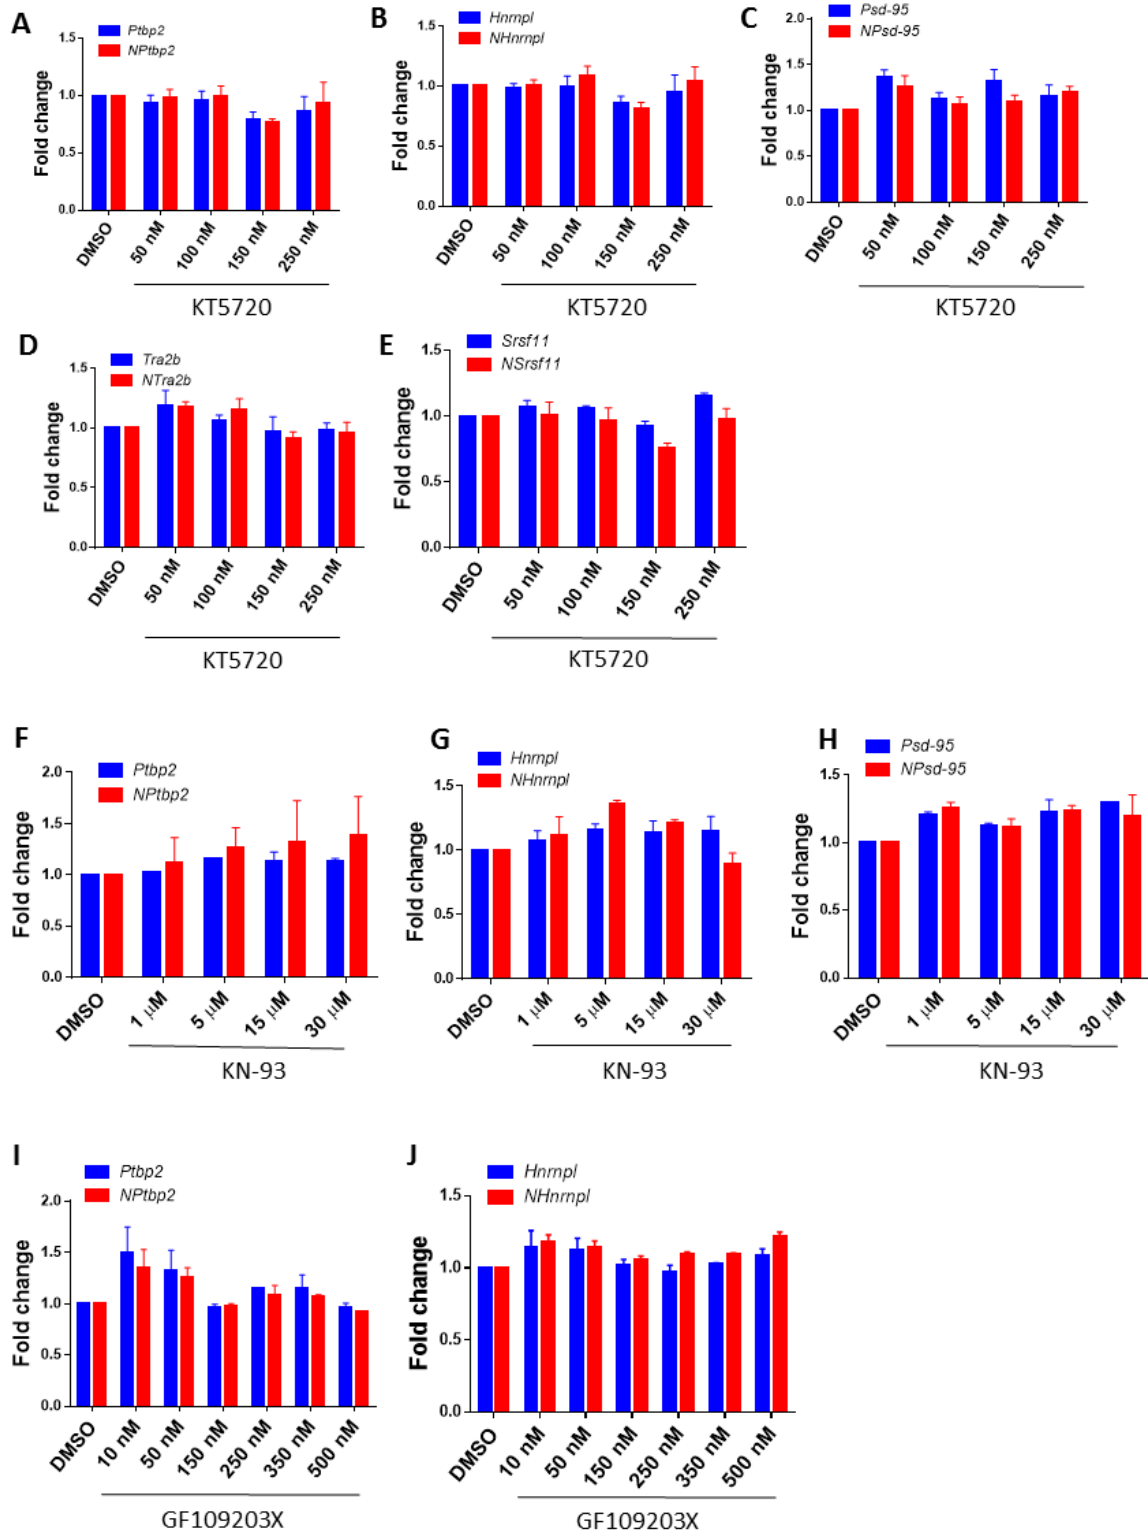

Supplemental Figure S3. Chemical inhibitors that did not have effects on NMD.

N2a cells were treated with each inhibitor at the indicated concentrations for 5 hours. Expression of NMD and non-NMD isoforms was examined by RT-qPCR. KT5720: PKA inhibitor (Tocris Bioscience, 1288100U). KN-93: CamKII inhibitor (Fisher Scientific, NC0362431). GF109203X: PKC inhibitor (R&D, A00061). N = 3. Error bars represent mean  $\pm$  SEM.

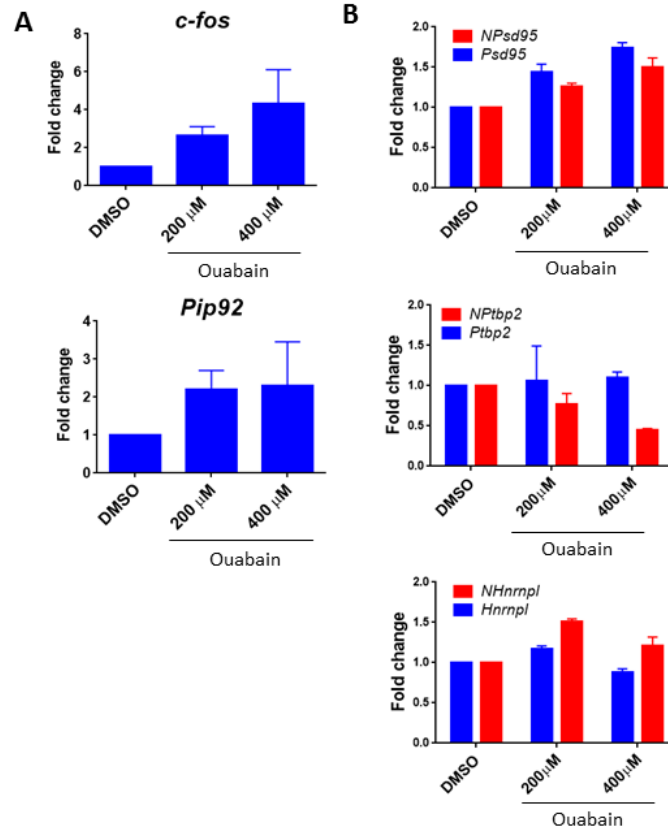

**Supplemental Figure S4. Ouabain did not cause consistent changes in the NMD targets.**

RT-qPCR assay of (A) immediate early genes *c-fos* and *Pip92* as well as (B) the NMD and non-NMD isoforms of *Psd-95*, *Ptbp2* and *Hnrnp1* in N2a cells treated with ouabain. Ouabain clearly induced *c-fos* and *Pip92*, but did not unequivocally affect NMD activity. N = 3. Error bars represent mean  $\pm$  SEM.

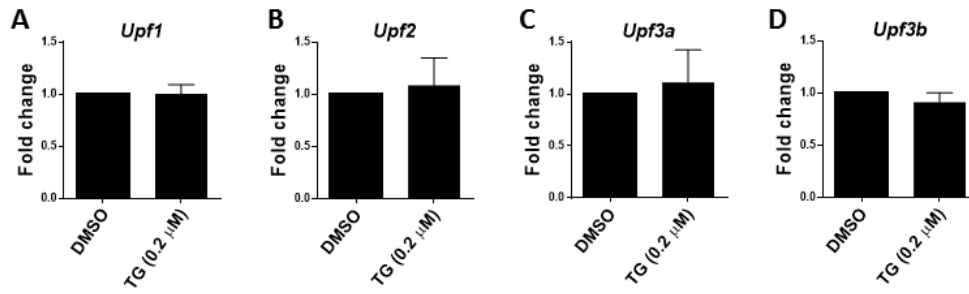

**Supplemental Figure S5. *Upf1*, *Upf2*, *Upf3a* and *Upf3b* expression after thapsigargin treatment.**

RT-qPCR assay targeting four major NMD factors (*Upf1*, *Upf2*, *Upf3a*, and *Upf3b*) in N2a cells showed no significant change in expression levels after 5 hours of DMSO or 0.2 μM thapsigargin (TG) treatments. N = 6. Error bars represent mean ± SEM.

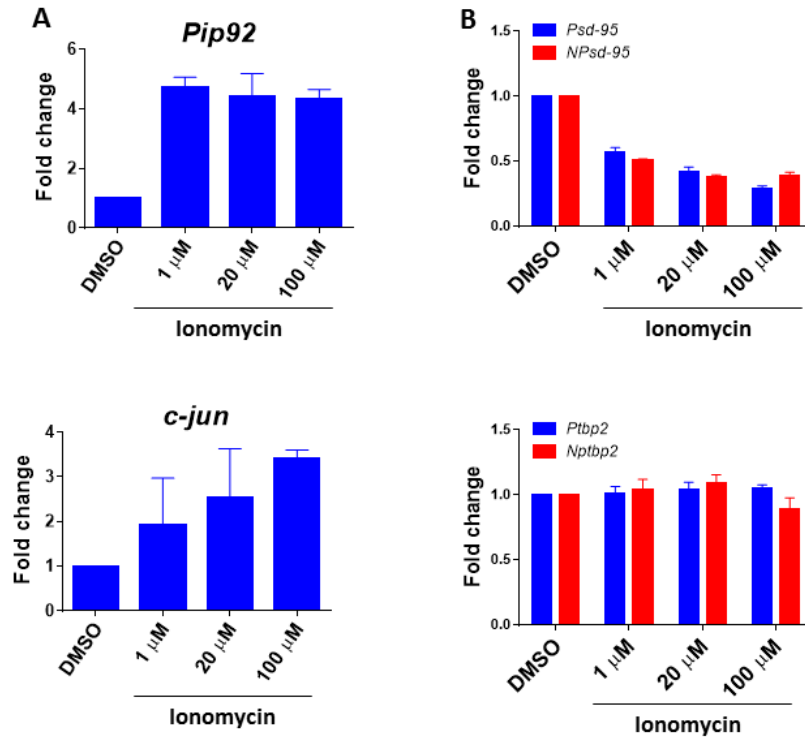

**Supplemental Figure S6. Ionomycin did not have uniform effects on NMD targets.**

RT-qPCR assay of (A) immediate early genes *c-fos* and *Pip92* as well as (B) the NMD and non-NMD isoforms of *Psd-95* and *Ptbp2* in ionomycin-treated N2a cells. Ionomycin induced *c-fos* and *Pip92* expression and exhibited gene specific effects on different AS-NMD targets. Ionomycin downregulated both isoforms of *Psd-95* but did not affect *Ptbp2*. N = 3. Error bars represent mean  $\pm$  SEM.

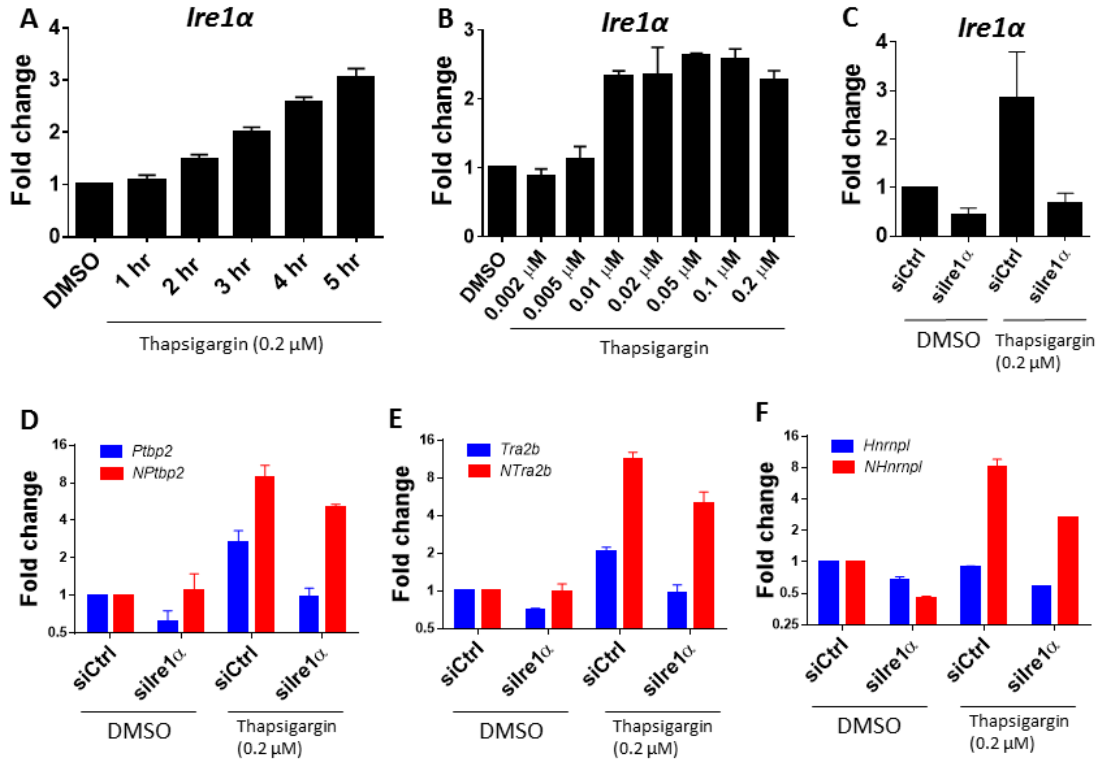

**Supplemental Figure S7. *Ire1α* expression and its effect on thapsigargin-induced NMD inhibition**

(A-B) *Ire1α* (*Ern1*) expressions upon thapsigargin treatment at various time points and dosages measured by RT-qPCR. (C) Expression level of *Ire1α* in cells treated with Silencer Select siRNA targeting *Ire1α*. (D-H) Expression (log<sub>2</sub> scale) of AS-NMD targets in *Ire1α*-depleted N2a cells at 5 hours after treatment with 0.2 μM thapsigargin. N = 3. Error bars represent mean ± SEM.



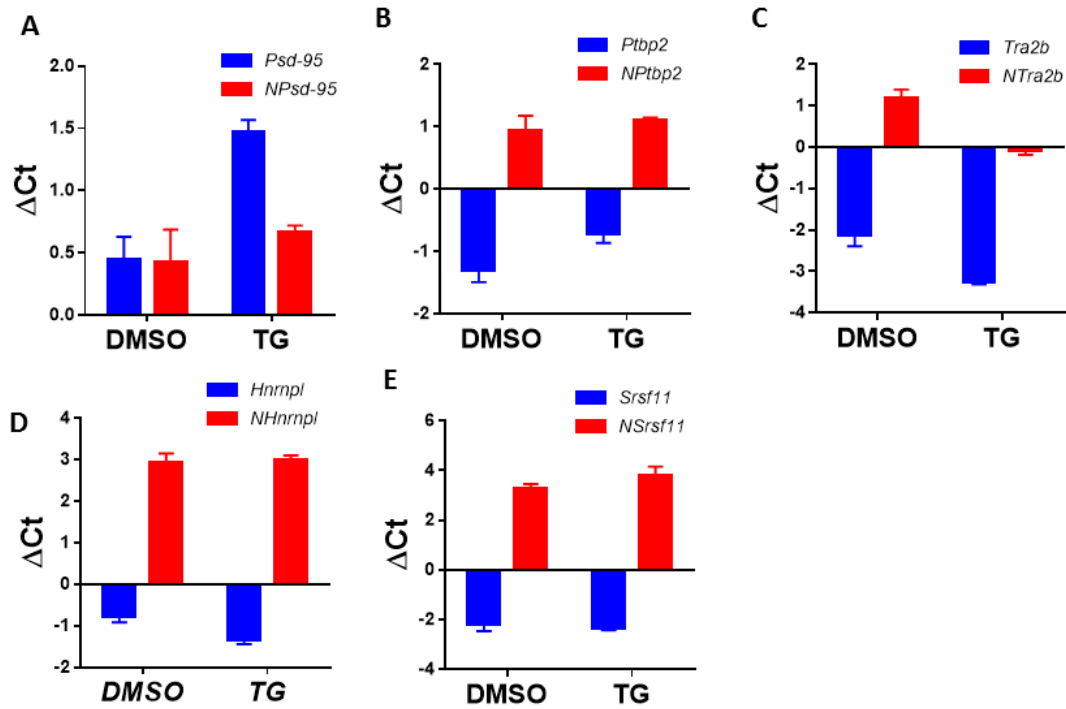

**Supplemental Figure S8. Abundance of AS-NMD targets in the polysome fractions.**

Polysomal RNA expression for both non-NMD and NMD isoforms of (A) *Psd-95*, (B) *Ptpb2*, (C) *Tra2b*, (D) *Hnrnp1* and (E) *Srsf11* was assessed by RT-qPCR to derive the  $\Delta\text{Ct}$  values in comparison to housekeeping gene *Sdha*. Both NMD and non-NMD isoforms were readily detectable on the polysomes. N = 3. Error bars represent mean  $\pm$  SEM.

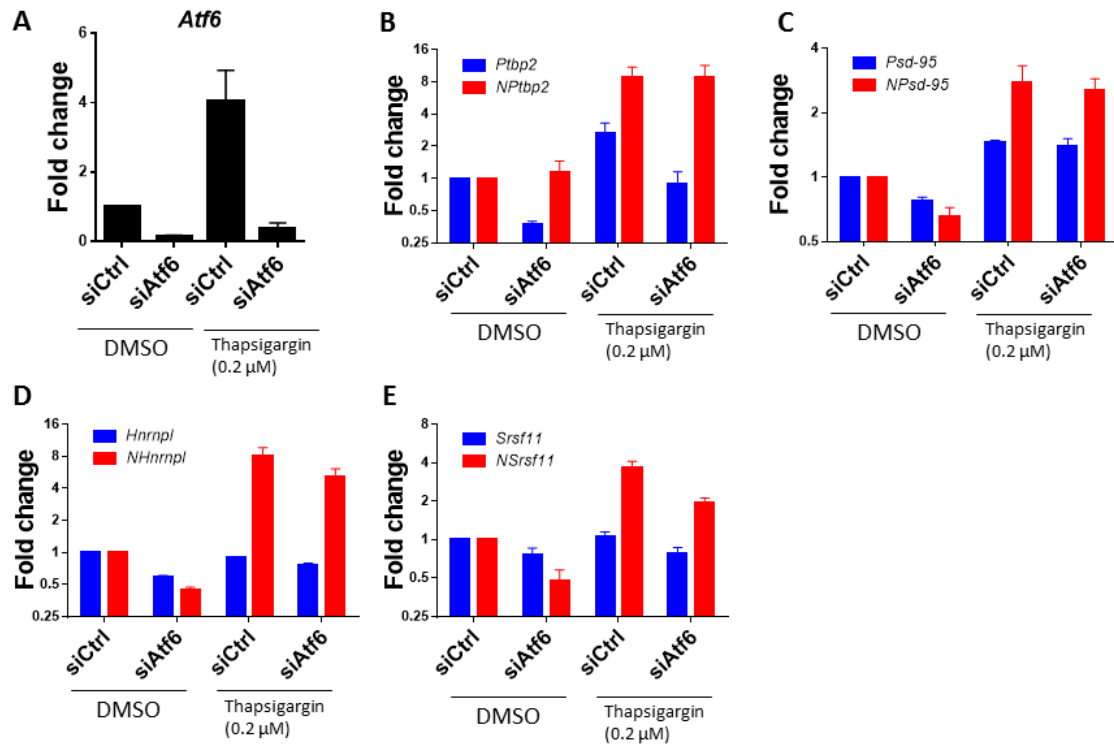

**Supplemental Figure S9. *Atf6α* expression and its effect on thapsigargin-induced NMD inhibition**

(A) Expression level of *Atf6α* in cells treated with Silencer Select siRNA targeting *Atf6α* and 0.2 μM thapsigargin. (B-E) Expression (log<sub>2</sub> scale) of AS-NMD targets in *Atf6α*-depleted N2a cells at 5 hours after treatment with 0.2 μM thapsigargin. N = 3. Error bars represent mean ± SEM.

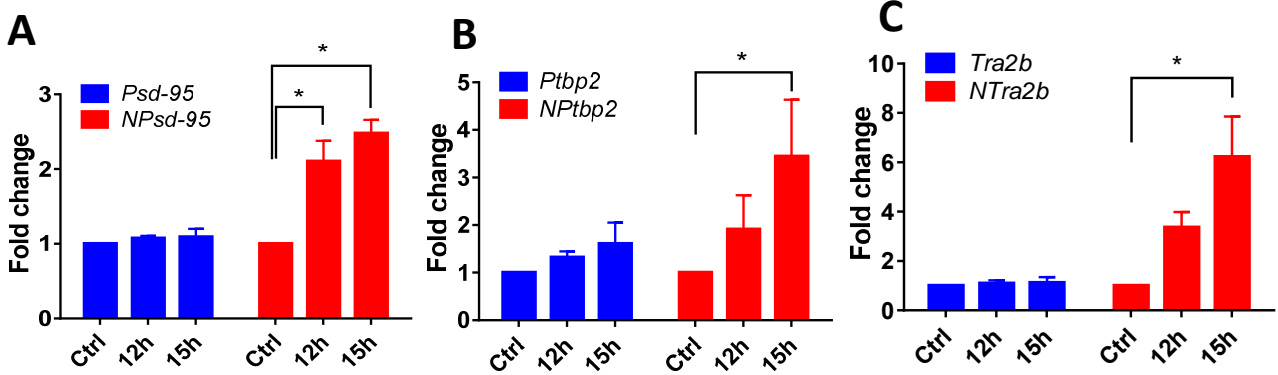

**Supplementary Figure S10. Deprivation of L-glutamine inhibits NMD.**

Expression levels of the NMD and non-NMD isoforms of *Psd-95* (A), *Ptbp2* (B) and *Tra2b* (C) in N2a cells cultured in L-glutamine-free media for 12 and 15 hours. The NMD isoforms but not the non-NMD isoforms were significantly upregulated by L-glutamine deprivation. A two-way ANOVA followed by Dunnett's multiple comparison tests was used to determine significant changes in gene expression. \*,  $P < 0.05$ . N=3. Error bars represent mean  $\pm$  SEM.

**Supplementary Table S1. RT-qPCR primers.**

| Targets                      | Forward               | Reverse                 | Size | Slope  | Y-inter | R <sup>2</sup> | Eff% | Confirmed linear range (Cq) | Cq variation at lower limit |
|------------------------------|-----------------------|-------------------------|------|--------|---------|----------------|------|-----------------------------|-----------------------------|
| <b>AS-NMD qPCR primers</b>   |                       |                         |      |        |         |                |      |                             |                             |
| Psd95_qPCR                   | TCCAGTCTGTGCGAGAGGTA  | ACGGATGAAGATGGCGATAG    | 116  | -3.275 | 32.001  | 0.990          | 100% | 22.007 - 32.139             | 0.2                         |
| NPsd95_qPCR                  | CGAGAGGTAGCAGAGCAGAGA | AAGCACTCCGTGAACTCCTG    | 105  | -3.296 | 31.473  | 0.990          | 100% | 21.050 - 27.916             | 0.1                         |
| Ptbp2_qPCR                   | TTACGCCCAAAGTCTGTTT   | CCCATCAGCCATCTGTATCA    | 107  | -3.417 | 30.309  | 0.988          | 96%  | 20.029 - 26.873             | 0.389                       |
| Ptbp2_NMD_qPCR               | GAGTCTCAGCTGGTGGCAAT  | TGCACATCTCCATAAACACCTC  | 72   | -3.346 | 34.659  | 0.990          | 99%  | 24.604 - 31.296             | 0.586                       |
| Srsf11_qPCR                  | TCCAGACTCAGCAGTTGTGG  | TTCATCAGGAATAACTCTTCAGC | 100  | -3.418 | 29.948  | 0.998          | 96%  | 19.755 - 30.042             | 0.07                        |
| Srsf11_NMD_qPCR              | TCCAGACTCAGCAGTTGTGG  | GGCTGAACCAGGGAAAAGA     | 102  | -3.397 | 35.431  | 0.994          | 97%  | 25.036 - 31.648             | 0.234                       |
| Tra2b_qPCR                   | GGAGCTTGACAGCTTCAGGA  | AAGCAGAACGGGATTCCC      | 105  | -3.340 | 29.231  | 0.998          | 100% | 19.217 - 25.841             | 0.043                       |
| Tra2b_NMD_qPCR               | TGGAATCAGAAAGCACTACGC | GAGTCTTCCTTGGAGCGAGA    | 116  | -3.458 | 35.032  | 0.998          | 95%  | 24.690 - 31.606             | 0.248                       |
| Hnrnp1_qPCR                  | CAACCTCAGTGGACAAGGTG  | CCTCATATTCTGCGGGATGA    | 92   | -3.211 | 28.059  | 0.999          | 104% | 18.394 - 24.832             | 0.117                       |
| Hnrnp1_NMD_qPCR              | GGTCGCAGTGTATGTTTGATG | GGCGTTTGTGGGGTACT       | 100  | -3.394 | 34.321  | 0.996          | 97%  | 24.209 - 30.801             | 0.313                       |
| <b>ER stress reporter</b>    |                       |                         |      |        |         |                |      |                             |                             |
| Xbp1s_qPCR                   | CTGAGTCCGCAGCAGGTG    | GGCAACAGTGTCAGAGTCCA    | 74   | -3.226 | 34.042  | 0.975          | 104% | 24.113 - 30.566             | 0.447                       |
| Bip_qPCR                     | CTGAGGCGTATTTGGGAAAG  | CAGCATCTTTGGTTGCTTGT    | 93   | -3.647 | 30.698  | 0.996          | 88%  | 19.634 - 26.928             | 0.051                       |
| Ern1_qPCR                    | TCCTAACAACCTGCCAAAC   | AGATACGGTGGTTCGGTGTGT   | 121  | -3.766 | 32.98   | 0.997          | 84%  | 21.711 - 29.303             | 0.244                       |
| Atf6a_qPCR                   | GCAGGAGGGGAGATACGTT   | GTGGTCTTGTGGGGTGGT      | 82   | -3.853 | 34.269  | 0.986          | 82%  | 22.918 - 30.624             | 0.48                        |
| <b>Immediate early genes</b> |                       |                         |      |        |         |                |      |                             |                             |
| Pip92                        | CCGACAATATGCTCAACGTG  | CTCGAAAGAAGCCACCAGAG    | 70   | -3.271 | 33.069  | 0.995          | 102% | 23.076 - 33.004             | 0.012                       |
| c-fos                        | GCAGAAGGGGCAAAGTAGAG  | GCAGCCATCTTATTCCGTTC    | 82   | -3.260 | 35.667  | 0.994          | 102% | 26.013 - 35.993             | 0.003                       |
| c-jun                        | GAAAAGTAGCCCCAACCTC   | GGGACACAGCTTTCACCCTA    | 102  | -3.377 | 33.839  | 0.994          | 98%  | 23.605 - 30.308             | 0.02                        |
| <b>Others</b>                |                       |                         |      |        |         |                |      |                             |                             |
| Tardbp (Tdp43)               | GGGGCAATCTGGTATATGTTG | TTCACTGCAGAGGAAGCATCT   | 82   | -3.144 | 27.647  | 0.998          | 108% | 18.262 - 24.55              | 0.102                       |
| eIF2ak3 (Perk)               | GGTCTGGTTCCCTGGTTTCA  | GGTCCCACTGGAAGAGGTC     | 99   | -3.169 | 32.367  | 1.000          | 106% | 22.886 - 29.224             | 0.033                       |
| Upf1                         | CCAGCGCTCTTACTTGGTG   | ACGCAGGACAGAATGATGAAG   | 132  | -3.405 | 30.229  | 0.998          | 97%  | 19.99 - 30.229              | 0.27                        |
| Upf2                         | TGTCCGCTTTATTGGAGAGC  | TGCATGCCATTTCAATATGAT   | 116  | -3.431 | 32.039  | 0.997          | 96%  | 21.756 - 28.617             | 0.264                       |
| Upf3a                        | GGAGACGAGAAGCAGGAAGA  | CGAGATCTCTTGTCCTTGG     | 104  | -3.366 | 33.887  | 0.999          | 98%  | 23.75 - 30.556              | 0.01                        |
| Upf3b                        | GATAGGCAGGATCGCAACAG  | TCCTGAAGCTGTTCCCTTGGT   | 95   | -3.329 | 33.615  | 0.995          | 100% | 23.451 - 30.464             | 0.306                       |
| U6                           | CGCTTCGGCAGCACATATAC  | ACGAATTTGCGTGTATCCT     | 84   | -3.415 | 29.4    | 0.999          | 96%  | 19.124 - 29.378             | 0.233                       |
| Gapdh                        | TGCGACTTCAACAGCAACTC  | CTTGCTCAGTGTCCCTTGCTG   | 200  | -3.32  | 24.06   | 0.999          | 100% | 13.54 - 21.84               | 0.08                        |
| Sdha                         | GCTTGCGAGCTGCATTTGG   | CATCTCCAGTTGTCCTTCCA    | 145  | -3.3   | 28.62   | 0.99           | 100% | 18.32 - 25.26               | 0.15                        |

Supplemental Table S2. Different sensitivity of NMD targets and their PTC positions

| Gene/isoform  | 3'UTR length | Distance from PTC to the first downstream splice junction (>50bp) | Sensitivity rank to <i>Upf2</i> knockout | Sensitivity rank to TG treatment |
|---------------|--------------|-------------------------------------------------------------------|------------------------------------------|----------------------------------|
| NHnrnpl       | 1244         | 83                                                                | 1                                        | 1                                |
| NTra2b        | 3333         | 195                                                               | 2                                        | 1                                |
| Nptbp2        | 2077         | 66                                                                | 2                                        | 3                                |
| NSrsf11       | 2854         | 86                                                                | 4                                        | 4                                |
| NPsd95 (DIg4) | 1024         | 80                                                                | 4                                        | 5                                |

**Supplementary Table S3. RT-PCR primers for splicing assay and genotyping primers.**

| Splicing Primers             | Forward                   | Reverse                     | T <sub>m</sub> (°C) | Size (inclusion)  | Size (exclusion)  |
|------------------------------|---------------------------|-----------------------------|---------------------|-------------------|-------------------|
| Psd-95                       | TCTGTGCGAGAGGTAGCAGA      | AAGCACTCCGTGAACTCCTG        | 60                  | 211               | 111               |
| Xbp1                         | TGGCCGGGTCTGCTGAGTCC<br>G | GTCCATGGGAAGATGTTCTG<br>G   | 56                  | 98                | 72                |
| ALS-associated cryptic exons |                           |                             |                     | Cryptic Inclusion | Cryptic exclusion |
| Ups15                        | CCAGGTGCATCCAATTTTTC      | GCCTGGCTGTTTCATTGTTTC       | 60                  | 338               | 174               |
| A23004<br>6K03Rik            | CAGCAGCTGCCAACTTCTA       | CATTGCATCTGTTGGTGAGG        | 60                  | 408               | 210               |
| Mib1                         | CAGCAATGCAAGCTGCTAGT      | TGGGATGACAACCAAAATCC        | 60                  | 332               | 273               |
| Genotyping primers           |                           |                             |                     | Size              |                   |
| Ptbp2<br>Wt                  | TCTACTTCATTGTGTTGTTTTG    | GATACAGCAGGCTCCCCTCA        | 60                  | 184               |                   |
| Ptbp2<br>Null                | TCTACTTCATTGTGTTGTTTTG    | AAATAAGCATTTTCTAGCACC<br>AA | 60                  | 455               |                   |
